# Supplementary material for: Adducts of a sterically hindered tellurium(iv) catecholate with diimines
Source: Royal Society of Chemistry journal article supplement (doi:10.1039/d4nj02469a), 2024-01-01
Supplement: d4nj02469a1.pdf [file d4nj02469a1.pdf]

Electronic Supplementary Information

**Adducts of a Sterically Hindered Tellurium(IV) Catecholate with Diimines**

Pavel A. Petrov,<sup>a\*</sup> Elizaveta A. Filippova,<sup>a</sup> Taisiya S. Sukhikh,<sup>a</sup> Dmitriy G. Sheven,<sup>a</sup> and  
Alexander S. Novikov<sup>b,c</sup>

<sup>a</sup> Nikolaev Institute of Inorganic Chemistry SB RAS, Prosp. Lavrentieva 3, 630090 Novosibirsk, Russia; e-mail: panah@niic.nsc.ru

<sup>b</sup> Institute of Chemistry, Saint Petersburg State University, Universitetskaya Nab., 7/9, 199034 Saint Petersburg, Russia;

<sup>c</sup> Peoples' Friendship University of Russia (RUDN University), Miklukho-Maklaya Street, 6, Moscow, 117198, Russia.

Contents

|    |                                       |     |
|----|---------------------------------------|-----|
| 1. | Results of X-ray diffraction analysis | S2  |
| 2. | NMR spectra                           | S3  |
| 3. | UV-vis spectra                        | S12 |
| 4. | Results of DFT calculations           | S13 |
| 5. | Mass spectra                          | S14 |
| 6. | References                            | S16 |

**Table S1.** Crystal data and structure refinement for structures **1**, **3**·C<sub>7</sub>H<sub>8</sub>, **4**·0.5CH<sub>2</sub>Cl<sub>2</sub>, **5**·C<sub>7</sub>H<sub>8</sub>, **6** and **7**.

| Identification code                       | <b>1</b>                                             | <b>3</b> ·C <sub>7</sub> H <sub>8</sub>                                        | <b>4</b> ·0.5CH <sub>2</sub> Cl <sub>2</sub>                                        | <b>5</b> ·C <sub>7</sub> H <sub>8</sub>                                        | <b>6</b>                                                         | <b>7</b>                                                                      |
|-------------------------------------------|------------------------------------------------------|--------------------------------------------------------------------------------|-------------------------------------------------------------------------------------|--------------------------------------------------------------------------------|------------------------------------------------------------------|-------------------------------------------------------------------------------|
| Empirical formula                         | C <sub>28</sub> H <sub>40</sub> O <sub>4</sub> Te    | C <sub>87</sub> H <sub>104</sub> N <sub>4</sub> O <sub>8</sub> Te <sub>2</sub> | C <sub>80.5</sub> H <sub>97</sub> O <sub>10</sub> N <sub>4</sub> Te <sub>2</sub> Cl | C <sub>91</sub> H <sub>112</sub> N <sub>4</sub> O <sub>8</sub> Te <sub>2</sub> | C <sub>48</sub> H <sub>64</sub> O <sub>4</sub> N <sub>2</sub> Te | C <sub>64</sub> H <sub>86</sub> N <sub>4</sub> O <sub>8</sub> Te <sub>2</sub> |
| Formula weight                            | 568.20                                               | 1588.94                                                                        | 1571.27                                                                             | 1645.04                                                                        | 860.61                                                           | 1294.56                                                                       |
| Crystal system, space group               | Triclinic, P-1                                       | Triclinic, P-1                                                                 | Monoclinic, P2 <sub>1</sub> /c                                                      | Triclinic, P-1                                                                 | Monoclinic, C2/c                                                 | Triclinic, P-1                                                                |
| a/Å                                       | 10.7879(19)                                          | 10.5866(11)                                                                    | 11.6110(3)                                                                          | 10.0622(2)                                                                     | 15.5230(3)                                                       | 10.2838(3)                                                                    |
| b/Å                                       | 11.946(2)                                            | 13.8449(13)                                                                    | 18.3720(7)                                                                          | 18.5721(5)                                                                     | 20.9039(5)                                                       | 11.0436(3)                                                                    |
| c/Å                                       | 21.895(4)                                            | 15.3756(15)                                                                    | 18.9824(8)                                                                          | 22.3625(6)                                                                     | 13.8186(4)                                                       | 14.4322(4)                                                                    |
| α/°                                       | 80.413(6)                                            | 107.420(4)                                                                     | 90                                                                                  | 80.2200(10)                                                                    | 90                                                               | 71.0190(10)                                                                   |
| β/°                                       | 79.028(5)                                            | 108.898(3)                                                                     | 106.9460(10)                                                                        | 86.4680(10)                                                                    | 95.5510(10)                                                      | 85.0980(10)                                                                   |
| γ/°                                       | 75.662(5)                                            | 98.439(4)                                                                      | 90                                                                                  | 84.5760(10)                                                                    | 90                                                               | 82.0150(10)                                                                   |
| Volume/Å <sup>3</sup>                     | 2662.5(9)                                            | 1958.8(3)                                                                      | 3873.5(2)                                                                           | 4095.43(18)                                                                    | 4462.99(19)                                                      | 1533.50(8)                                                                    |
| Z                                         | 4                                                    | 1                                                                              | 2                                                                                   | 2                                                                              | 4                                                                | 1                                                                             |
| ρ <sub>calc</sub> /g cm <sup>-3</sup>     | 1.417                                                | 1.347                                                                          | 1.347                                                                               | 1.334                                                                          | 1.281                                                            | 1.402                                                                         |
| μ/mm <sup>-1</sup>                        | 1.147                                                | 0.803                                                                          | 0.846                                                                               | 0.770                                                                          | 0.710                                                            | 1.007                                                                         |
| F(000)                                    | 1168.0                                               | 822.0                                                                          | 1618.0                                                                              | 1708.0                                                                         | 1800.0                                                           | 666.0                                                                         |
| Crystal size/mm                           | 0.28×0.03×0.03                                       | 0.13×0.11×0.09                                                                 | 0.18×0.10×0.09                                                                      | 0.2×0.11×0.07                                                                  | 0.23×0.1×0.08                                                    | 0.11×0.05×0.05                                                                |
| 2θ range for data collection/°            | 3.548–50.076                                         | 4.56–59.216                                                                    | 4.312–52.76                                                                         | 4.07–54.206                                                                    | 4.244–54.22                                                      | 4.892–54.292                                                                  |
| Index ranges                              | –12 ≤ h ≤ 12,<br>–14 ≤ k ≤ 14,<br>–26 ≤ l ≤ 26       | –14 ≤ h ≤ 14,<br>–18 ≤ k ≤ 19,<br>–20 ≤ l ≤ 21                                 | –14 ≤ h ≤ 14,<br>–22 ≤ k ≤ 21,<br>–16 ≤ l ≤ 23                                      | –12 ≤ h ≤ 12,<br>–23 ≤ k ≤ 23,<br>–28 ≤ l ≤ 28                                 | –19 ≤ h ≤ 19,<br>–26 ≤ k ≤ 26,<br>–17 ≤ l ≤ 17                   | –13 ≤ h ≤ 13,<br>–14 ≤ k ≤ 14,<br>–18 ≤ l ≤ 18                                |
| Reflections collected (R <sub>int</sub> ) | 16229 (0.0990)                                       | 39449 (0.0522)                                                                 | 22103 (0.0478)                                                                      | 56055 (0.0461)                                                                 | 23856 (0.0442)                                                   | 17075 (0.0459)                                                                |
| Data/restraints/parameters                | 9281/0/619                                           | 10687/61/464                                                                   | 7878/0/445                                                                          | 17956/223/1016                                                                 | 4926/0/258                                                       | 6761/0/364                                                                    |
| Goodness-of-fit on F <sup>2</sup>         | 0.933                                                | 1.042                                                                          | 1.025                                                                               | 0.995                                                                          | 1.010                                                            | 0.965                                                                         |
| Final R indexes [I>=2σ(I)]                | R <sub>1</sub> = 0.0723,<br>wR <sub>2</sub> = 0.1504 | R <sub>1</sub> = 0.0343,<br>wR <sub>2</sub> = 0.0751                           | R <sub>1</sub> = 0.0356,<br>wR <sub>2</sub> = 0.0707                                | R <sub>1</sub> = 0.0376,<br>wR <sub>2</sub> = 0.0852                           | R <sub>1</sub> = 0.0240,<br>wR <sub>2</sub> = 0.0559             | R <sub>1</sub> = 0.0417,<br>wR <sub>2</sub> = 0.0962                          |
| Final R indexes [all data]                | R <sub>1</sub> = 0.1366,<br>wR <sub>2</sub> = 0.1762 | R <sub>1</sub> = 0.0405,<br>wR <sub>2</sub> = 0.0791                           | R <sub>1</sub> = 0.0564,<br>wR <sub>2</sub> = 0.0766                                | R <sub>1</sub> = 0.0590,<br>wR <sub>2</sub> = 0.0938                           | R <sub>1</sub> = 0.0305,<br>wR <sub>2</sub> = 0.0579             | R <sub>1</sub> = 0.0522,<br>wR <sub>2</sub> = 0.1062                          |
| Largest diff. peak/hole/e Å <sup>-3</sup> | 1.64/–1.42                                           | 1.03/–0.87                                                                     | 0.42/–0.49                                                                          | 0.66/–0.54                                                                     | 0.37/–0.39                                                       | 1.64/–0.73                                                                    |
| CCDC                                      | 2287464                                              | 2287467                                                                        | 2287466                                                                             | 2287465                                                                        | 2287463                                                          | 2287462                                                                       |

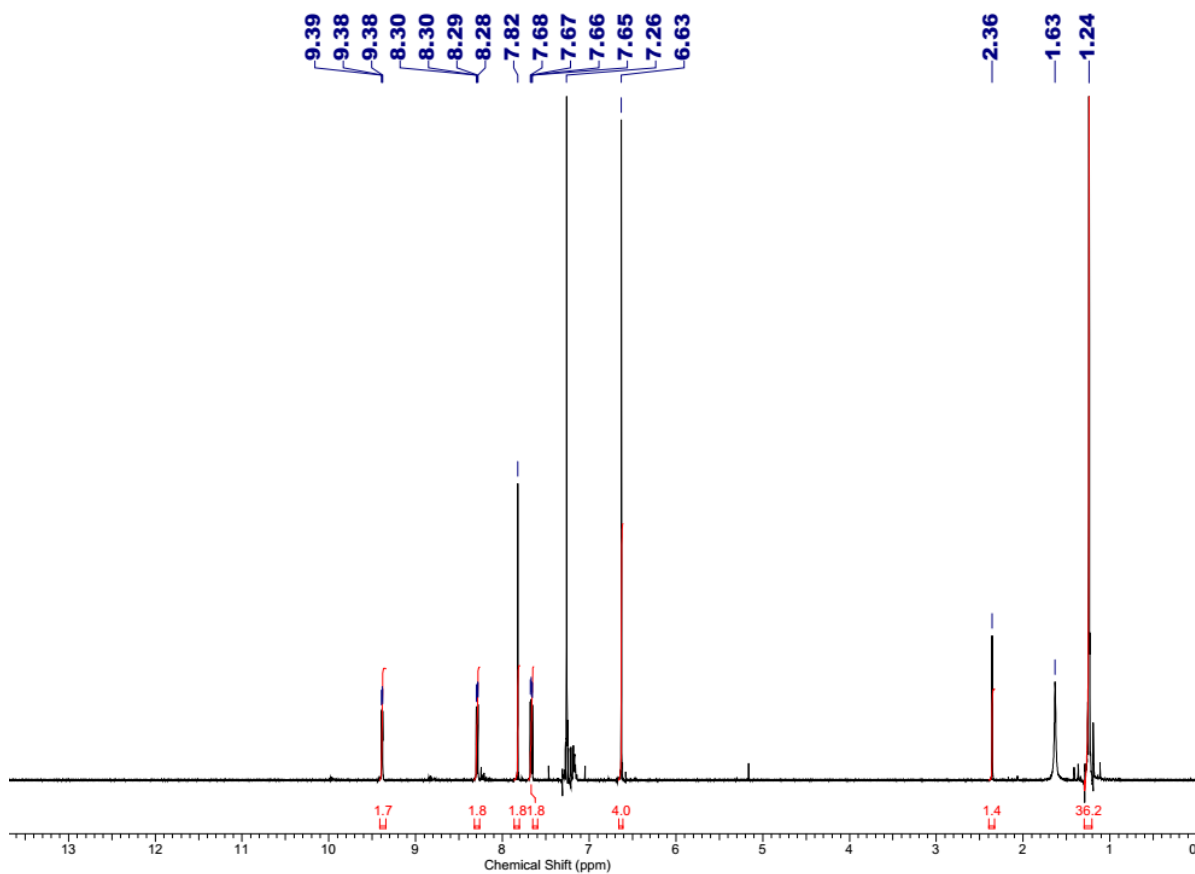

Fig. S1.  $^1\text{H}$  NMR spectrum of  $[\text{Te}(\text{Cat}^{36})_2(\text{phen})]_2 \cdot \text{C}_7\text{H}_8$  ( $3 \cdot \text{C}_7\text{H}_8$ ) ( $\text{CDCl}_3$ , 298K).

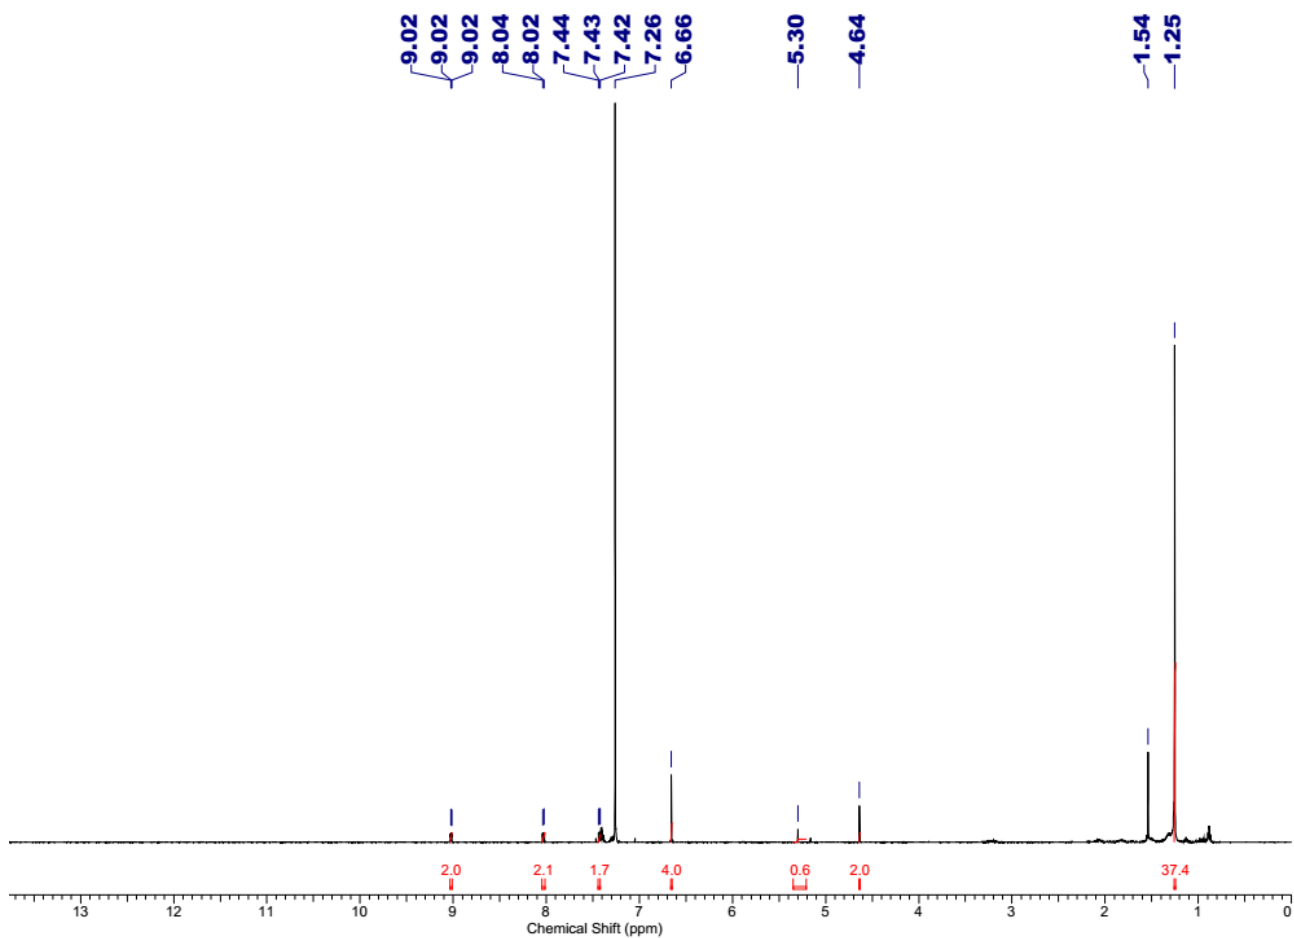

Fig. S2.  $^1\text{H}$  NMR spectrum of  $[\text{Te}(\text{Cat}^{36})_2(\text{phenO})]_2 \cdot 0.5\text{CH}_2\text{Cl}_2$  ( $4 \cdot 0.5\text{CH}_2\text{Cl}_2$ ) ( $\text{CDCl}_3$ , 298K).

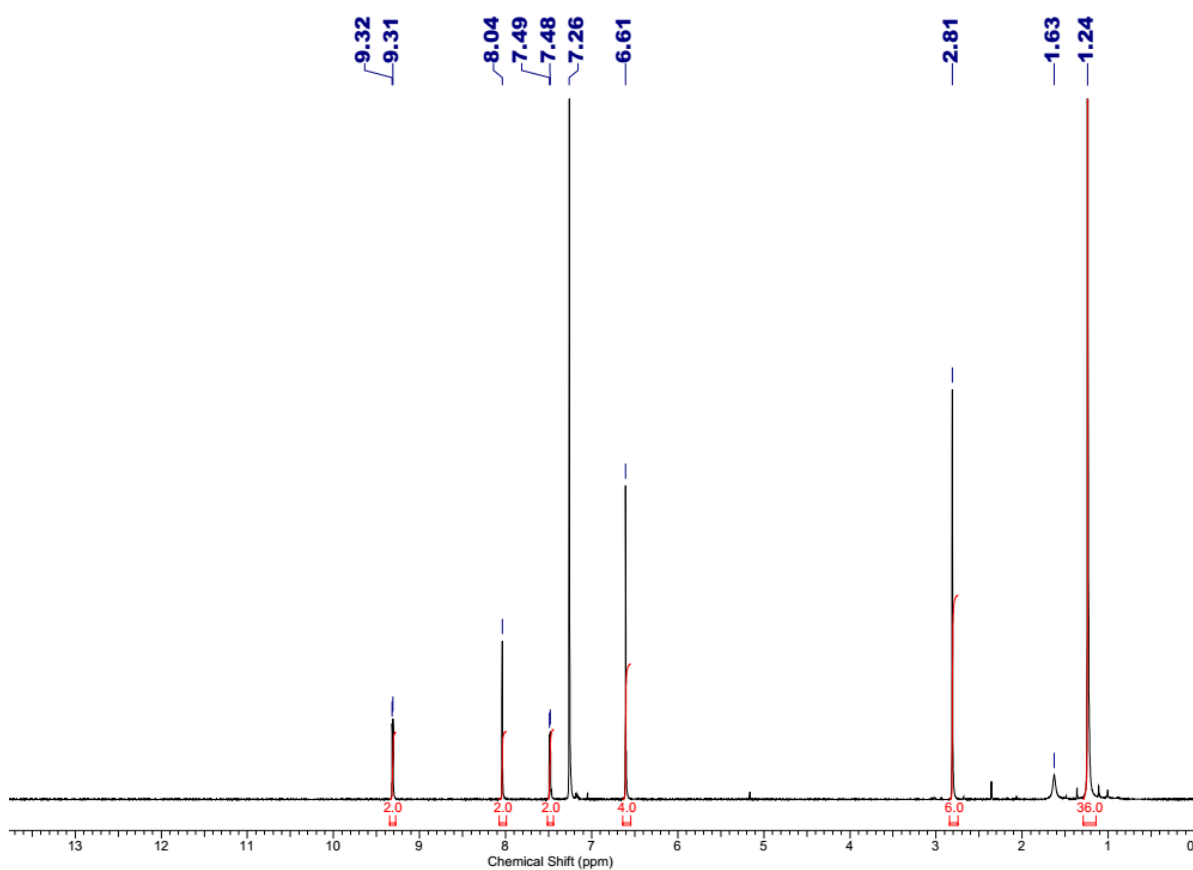

**Fig. S3.**  $^1\text{H}$  NMR spectrum of  $[\text{Te}(\text{Cat}^{36})_2(\text{phenMe}_2)_2]$  (**5**) ( $\text{CDCl}_3$ , 298K).

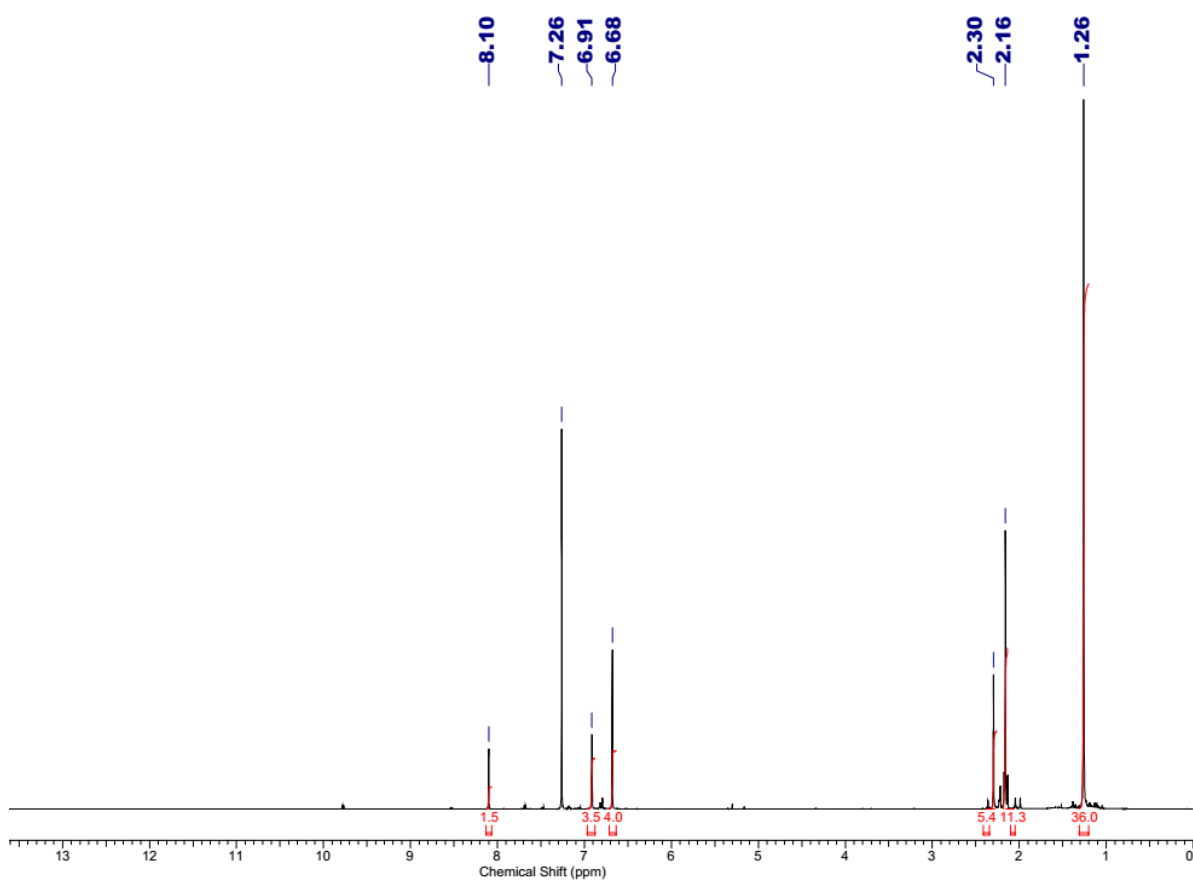

**Fig. S4.**  $^1\text{H}$  NMR spectrum of  $[\text{Te}(\text{Cat}^{36})_2(\text{DAB}^{\text{Mes,H}})]_\infty$  (**6**) ( $\text{CDCl}_3$ , 298K).

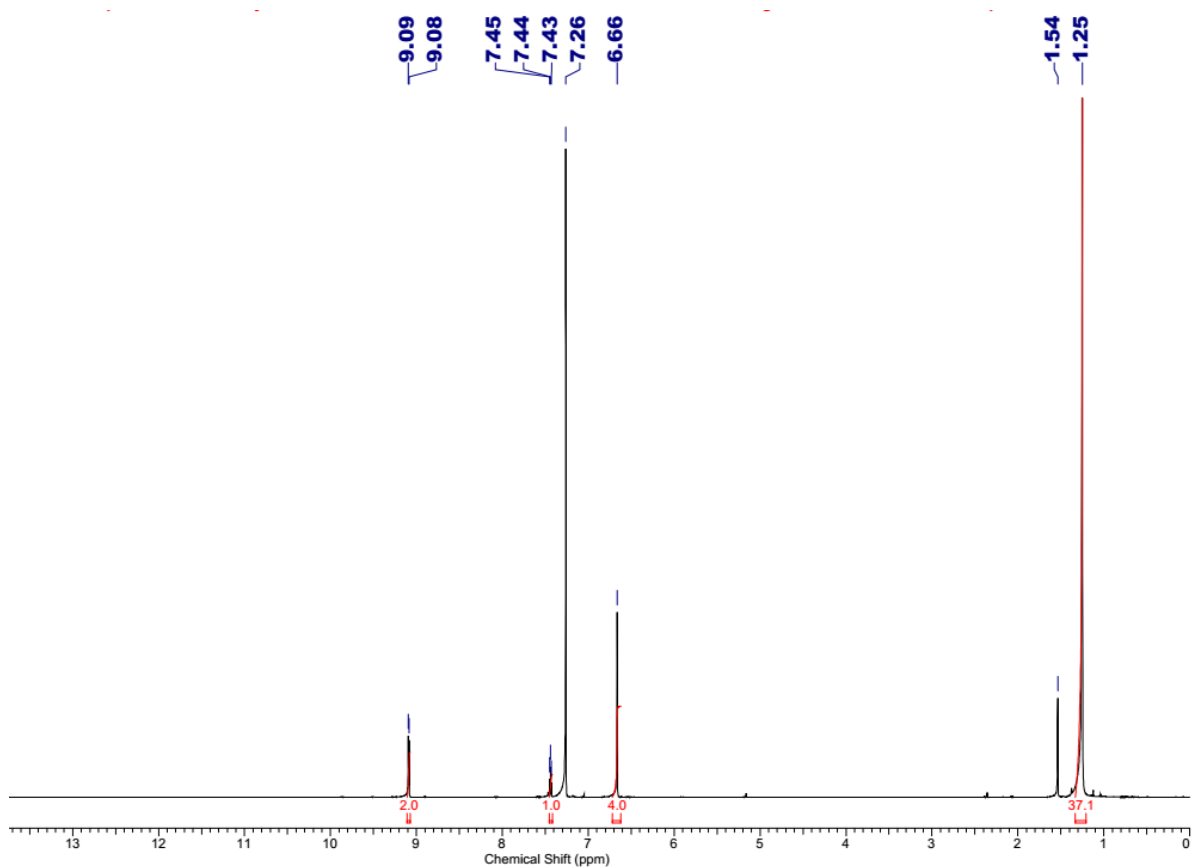

**Fig. S5.**  $^1\text{H}$  NMR spectrum of  $[\{\text{Te}(\text{Cat}^{36})_2\}_2(\text{bpm})]$  (**7**) ( $\text{CDCl}_3$ , 298K).

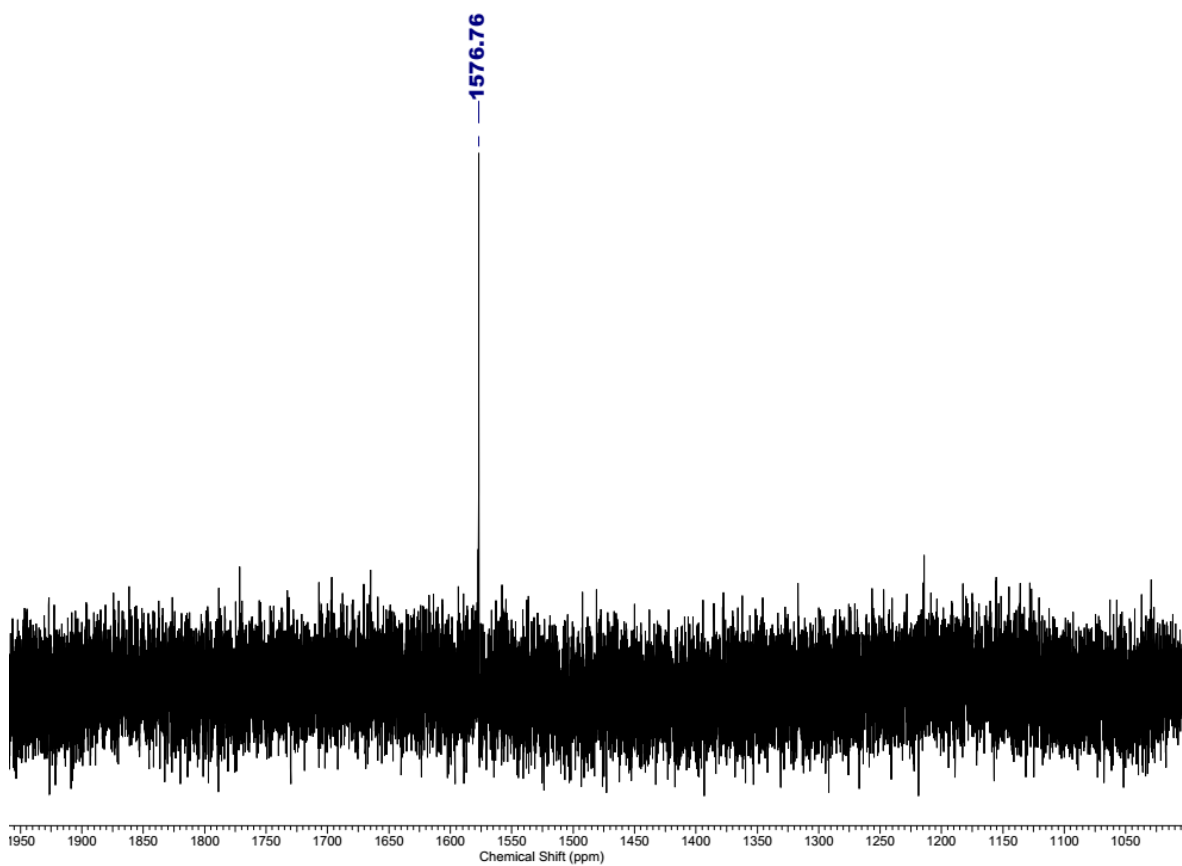

**Fig. S6.**  $^{125}\text{Te}$  NMR spectrum of  $[\text{Te}(\text{Cat}^{36})_2(\text{phen})]_2 \cdot \text{C}_7\text{H}_8$  (**3**· $\text{C}_7\text{H}_8$ ) ( $\text{CH}_2\text{Cl}_2$ , 298K).

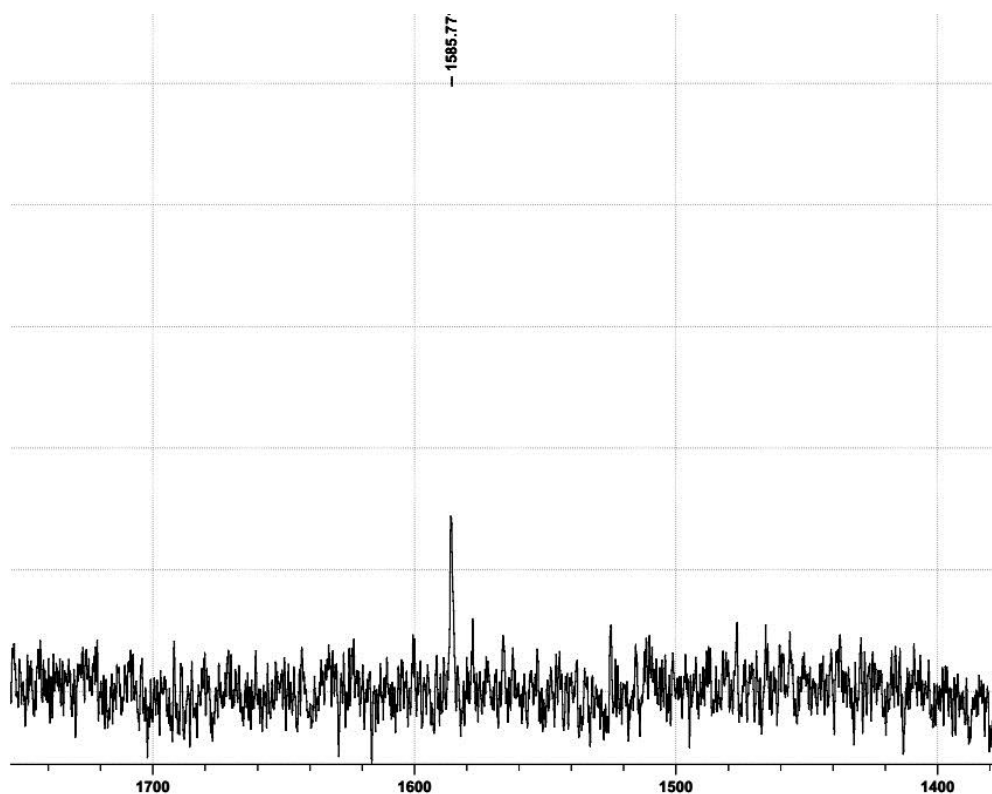

Fig. S7.  $^{125}\text{Te}$  NMR spectrum of  $[\text{Te}(\text{Cat}^{36})_2(\text{phenO})]_2 \cdot 0.5\text{CH}_2\text{Cl}_2$  ( $4 \cdot 0.5\text{CH}_2\text{Cl}_2$ ) ( $\text{CH}_2\text{Cl}_2$ , 298K).

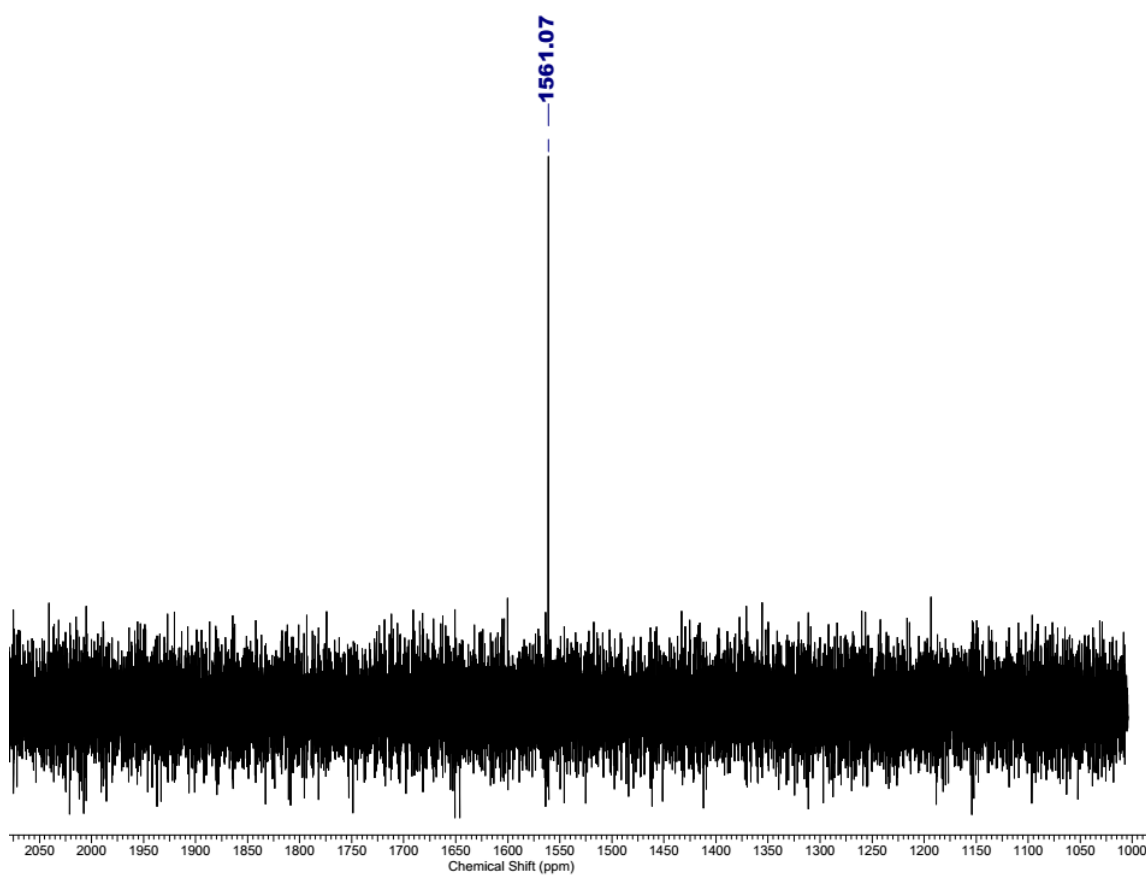

Fig. S8.  $^{125}\text{Te}$  NMR spectrum of  $[\text{Te}(\text{Cat}^{36})_2(\text{phenMe}_2)]_2$  (**5**) ( $\text{CH}_2\text{Cl}_2$ , 298K).

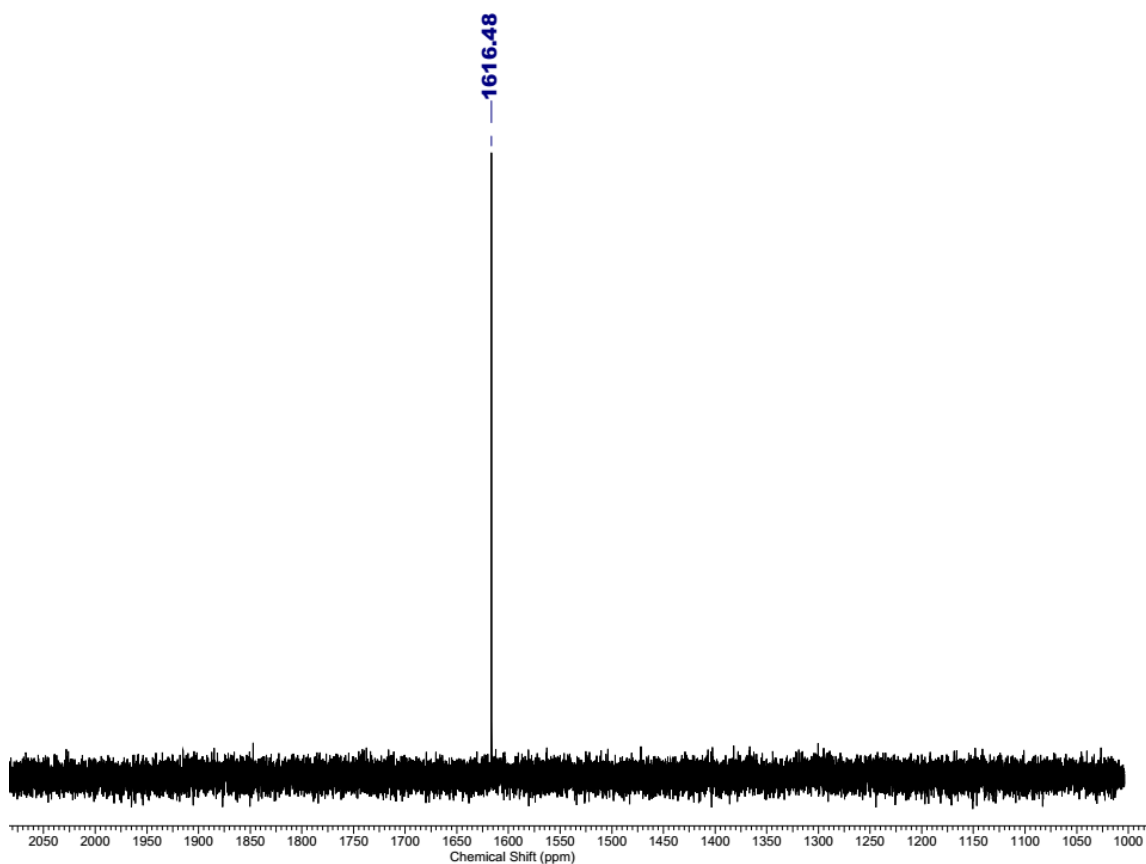

**Fig. S9.**  $^{125}\text{Te}$  NMR spectrum of  $[\text{Te}(\text{Cat}^{36})_2(\text{DAB}^{\text{Mes,H}})]_\infty$  (**6**) ( $\text{CH}_2\text{Cl}_2$ , 298K).

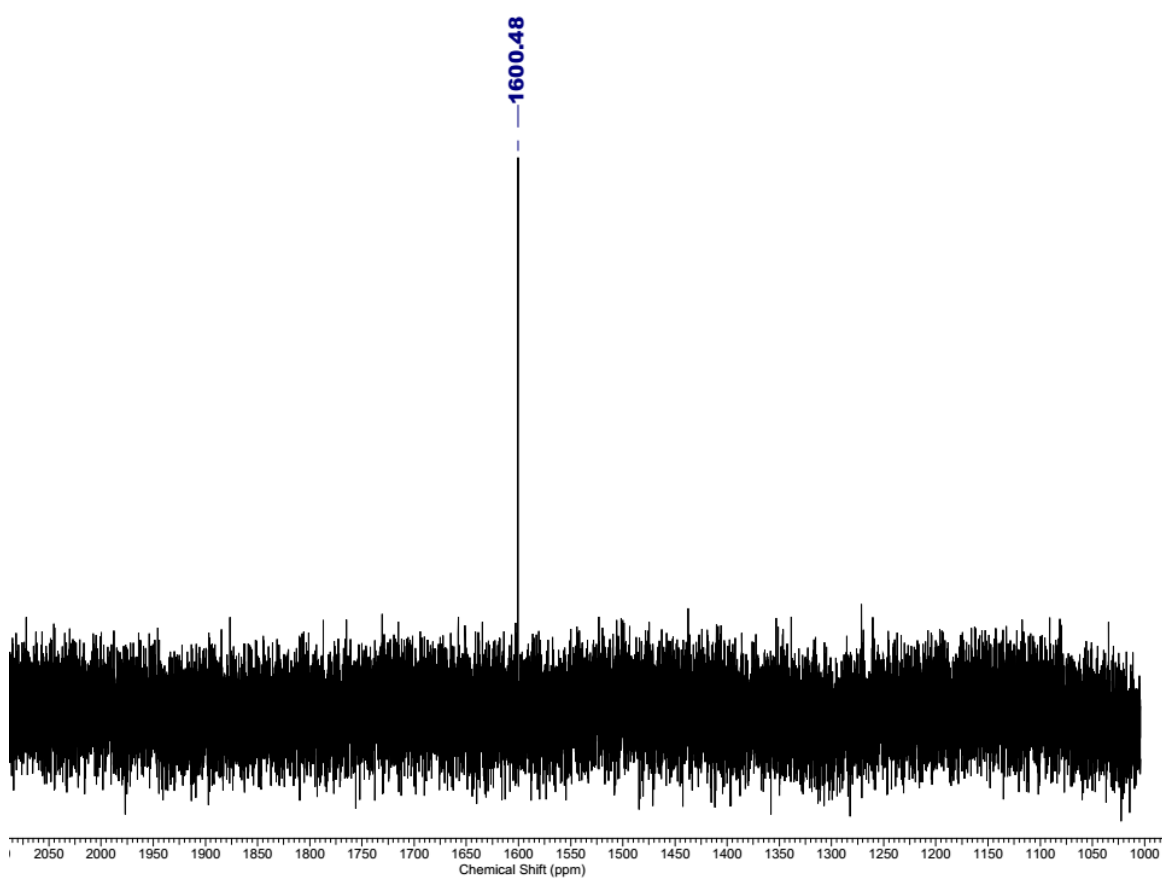

**Fig. S10.**  $^{125}\text{Te}$  NMR spectrum of  $[\{\text{Te}(\text{Cat}^{36})_2(\text{bpm})\}]$  (**7**) ( $\text{CH}_2\text{Cl}_2$ , 298K).

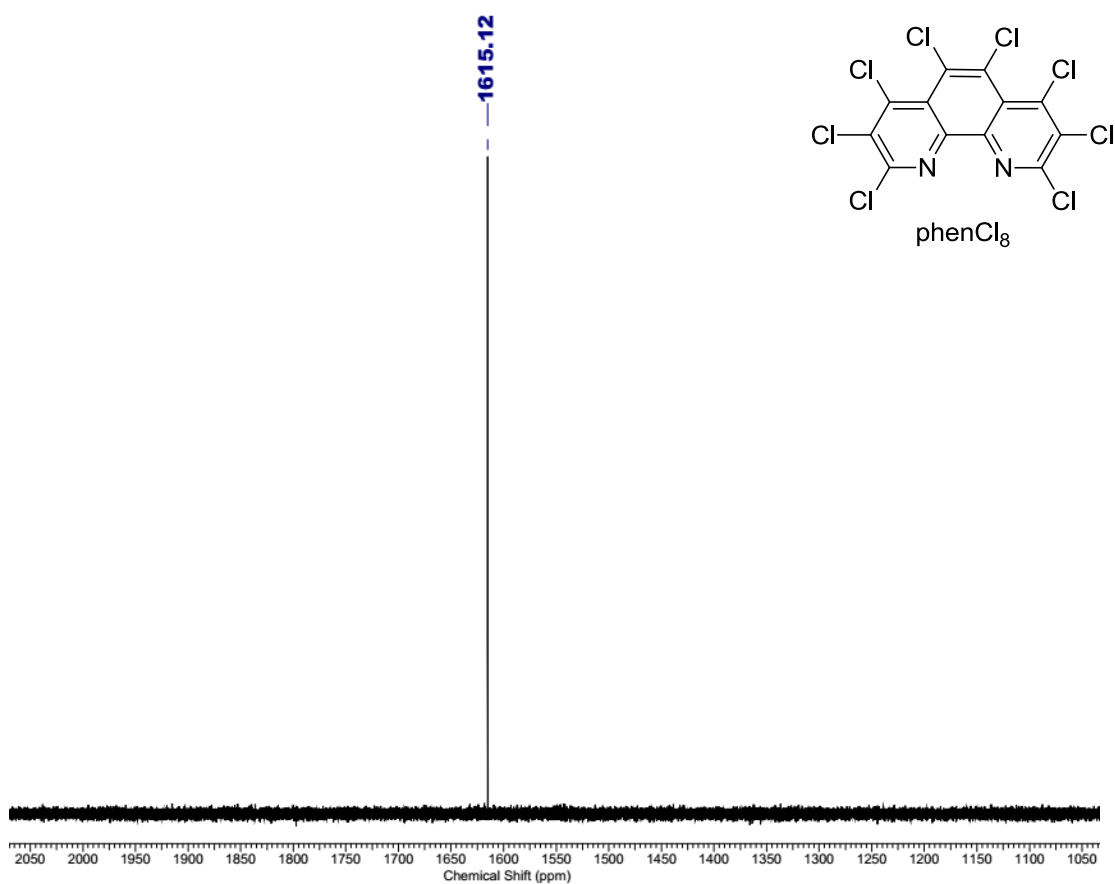

**Fig. S11.**  $^{125}\text{Te}$  NMR spectrum of  $\text{Te}(\text{Cat}^{36})_2$  with phenCl<sub>8</sub> (1.1 eq.) added ( $\text{CH}_2\text{Cl}_2$ , 298K).

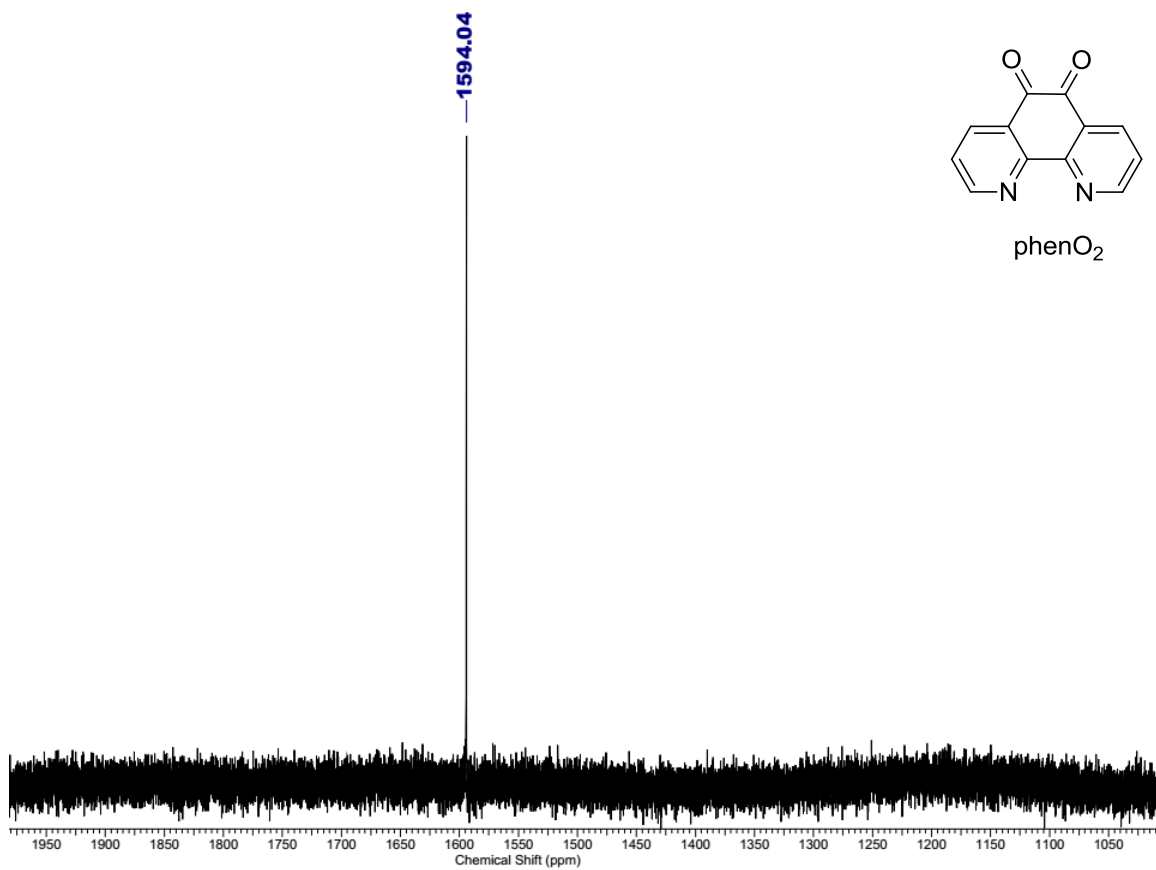

**Fig. S12.**  $^{125}\text{Te}$  NMR spectrum of  $\text{Te}(\text{Cat}^{36})_2$  with phenO<sub>2</sub> (1.1 eq.) added ( $\text{CH}_2\text{Cl}_2$ , 298K).



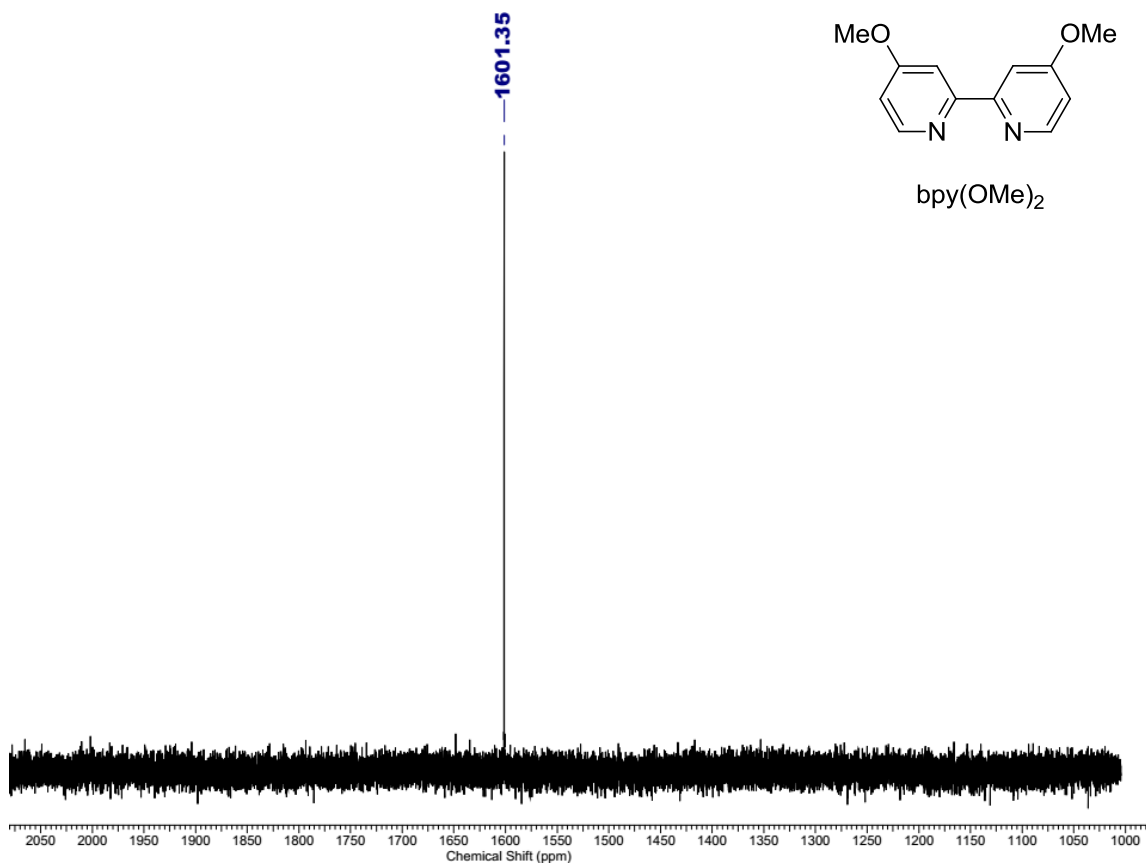

**Fig. S13.** <sup>125</sup>Te NMR spectrum of Te(Cat<sup>36</sup>)<sub>2</sub> with bpy(OMe)<sub>2</sub> (1.1 eq.) added (CH<sub>2</sub>Cl<sub>2</sub>, 298K).

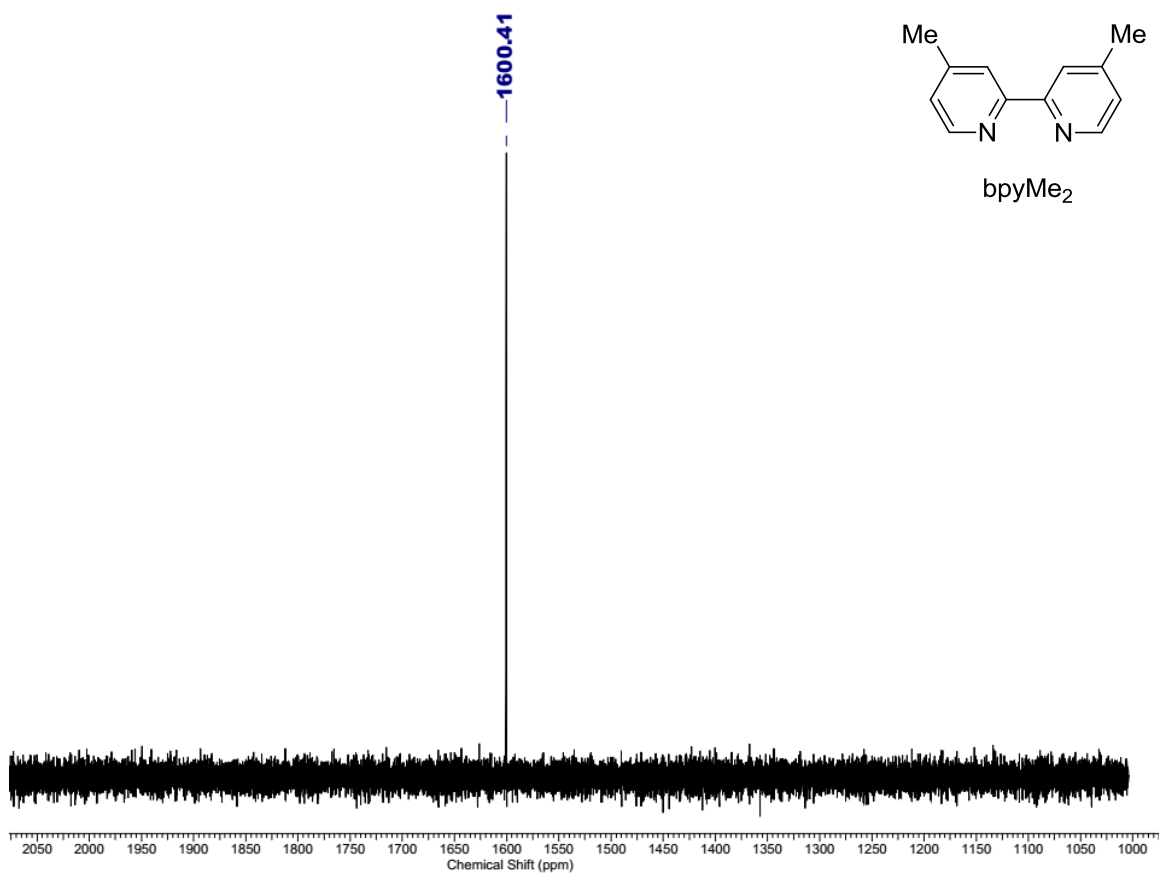

**Fig. S14.** <sup>125</sup>Te NMR spectrum of Te(Cat<sup>36</sup>)<sub>2</sub> with bpyMe<sub>2</sub> (1.1 eq.) added (CH<sub>2</sub>Cl<sub>2</sub>, 298K).

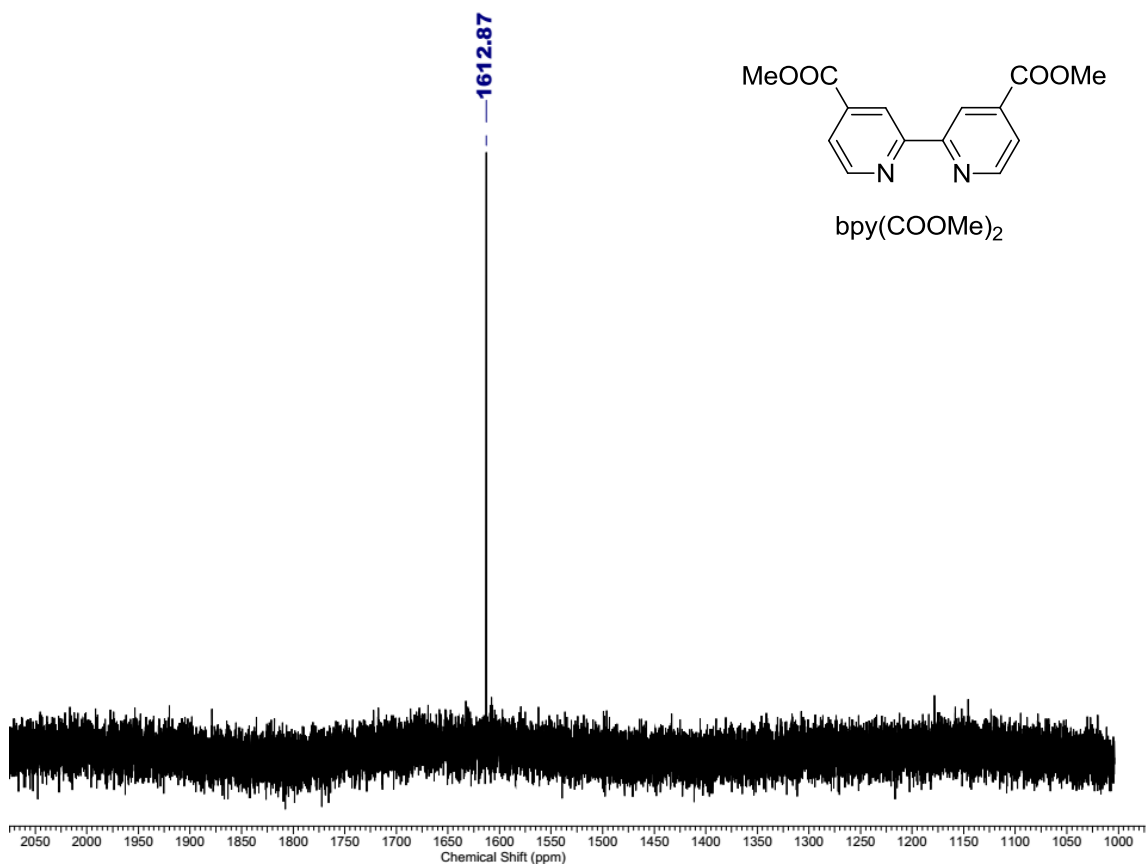

Fig. S15.  $^{125}\text{Te}$  NMR spectrum of  $\text{Te}(\text{Cat}^{36})_2$  with  $\text{bpy}(\text{COOMe})_2$  (1.1 eq.) added ( $\text{CH}_2\text{Cl}_2$ , 298K).

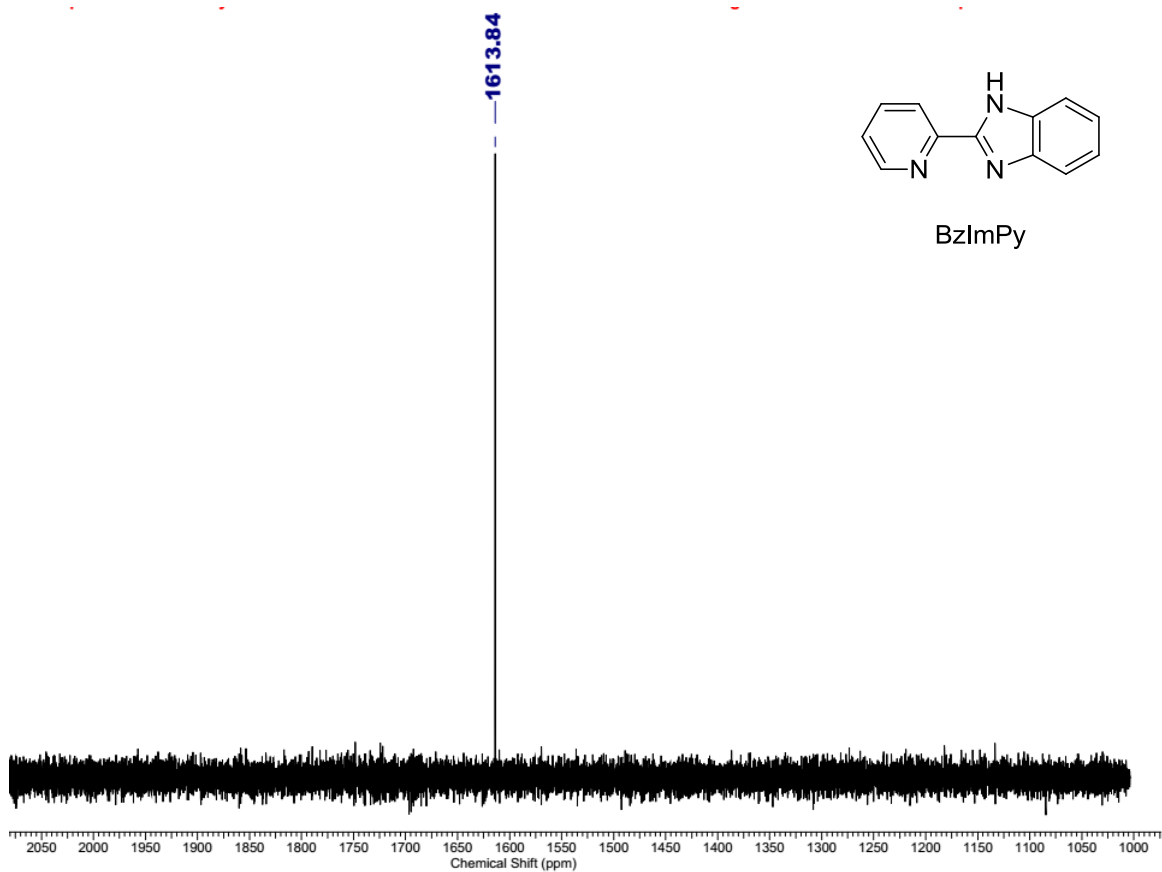

Fig. S16.  $^{125}\text{Te}$  NMR spectrum of  $\text{Te}(\text{Cat}^{36})_2$  with  $\text{BzImPy}$  (1.1 eq.) added ( $\text{CH}_2\text{Cl}_2$ , 298K).

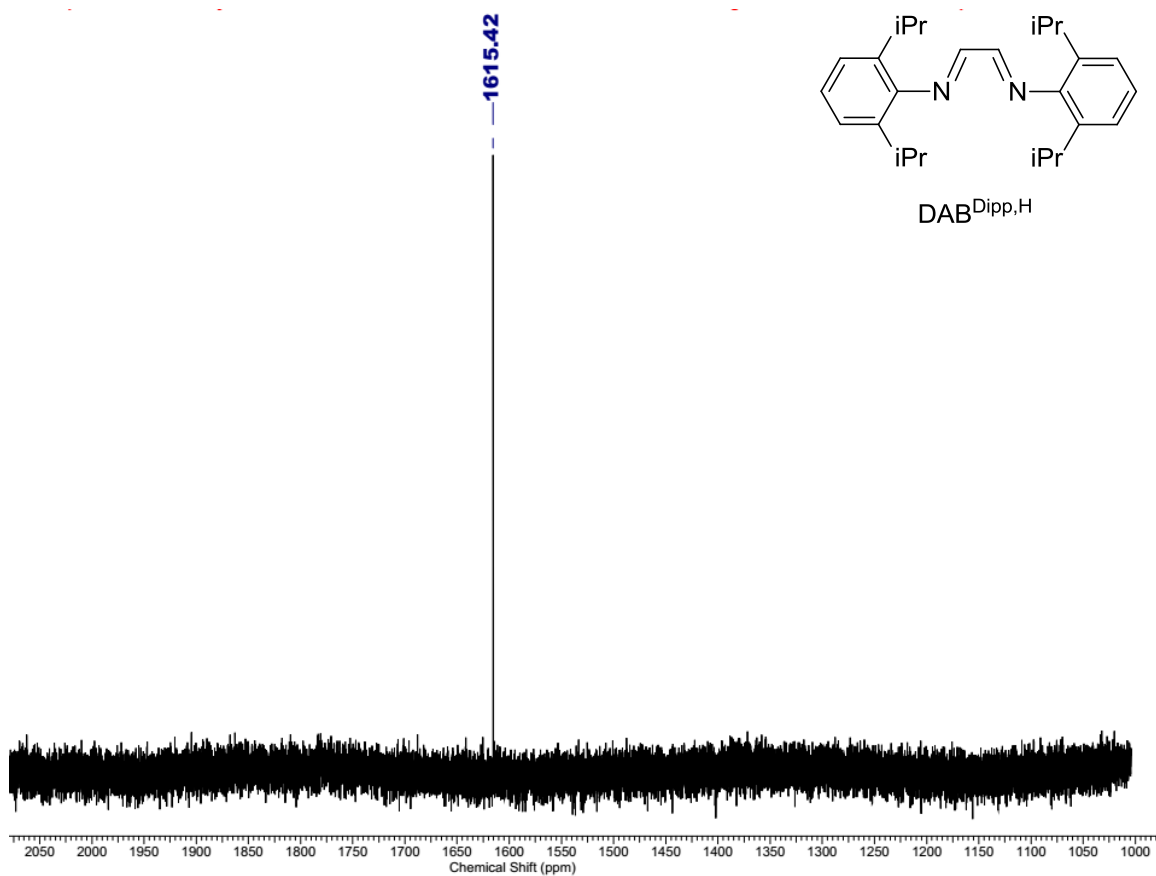

**Fig. S17.**  $^{125}\text{Te}$  NMR spectrum of  $\text{Te}(\text{Cat}^{36})_2$  with  $\text{DAB}^{\text{Dipp,H}}$  (1.1 eq.) added ( $\text{CH}_2\text{Cl}_2$ , 298K).

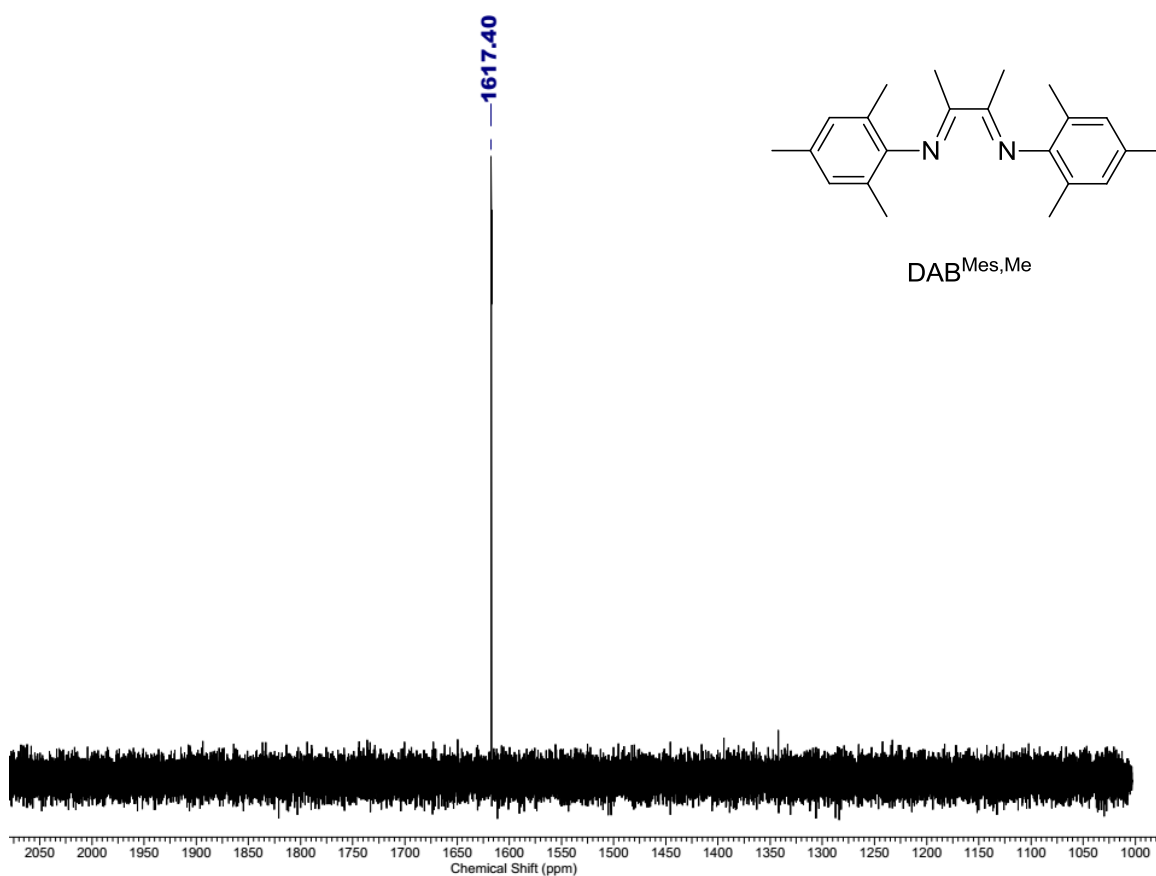

**Fig. S18.**  $^{125}\text{Te}$  NMR spectrum of  $\text{Te}(\text{Cat}^{36})_2$  with  $\text{DAB}^{\text{Mes,Me}}$  (1.1 eq.) added ( $\text{CH}_2\text{Cl}_2$ , 298K).

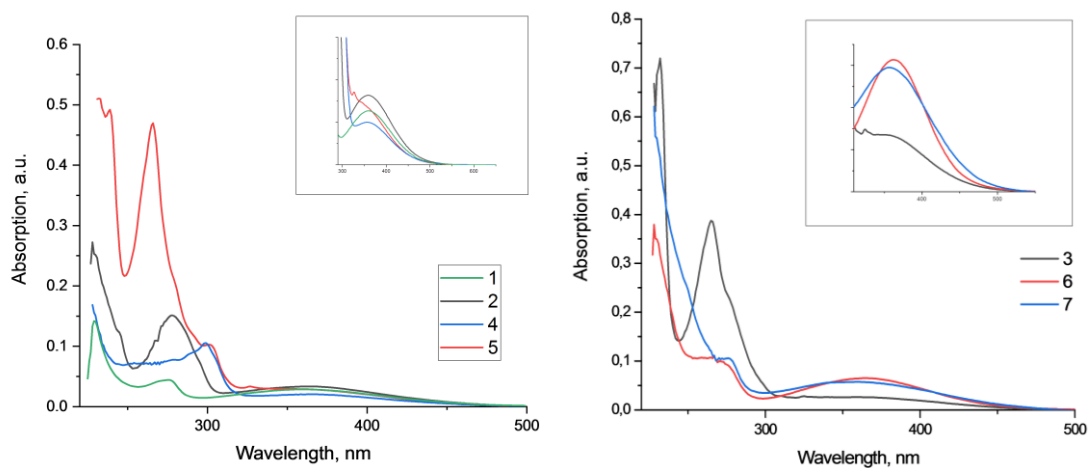

**Fig. S19.** UV-vis spectra of complexes **1–7** in  $\text{CH}_2\text{Cl}_2$  solution.

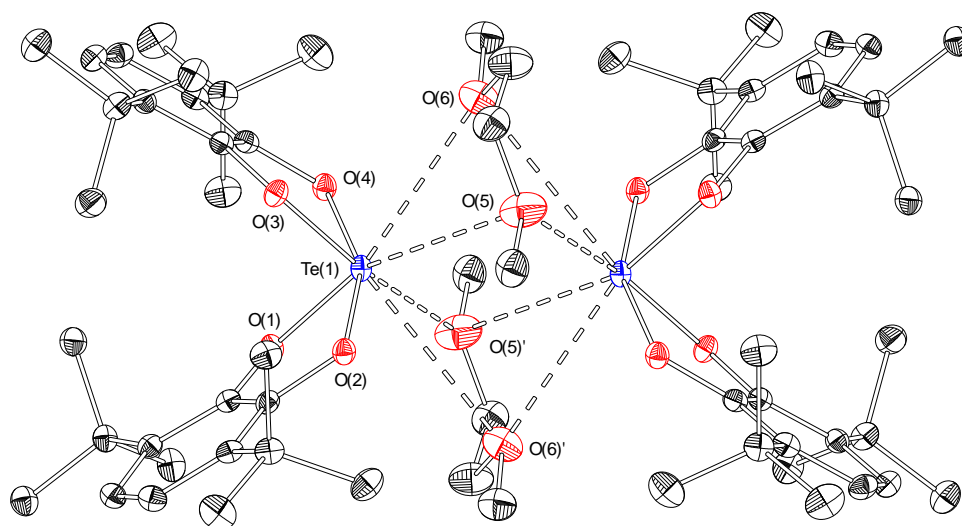

**Fig. S20.** Molecular structure of  $[\text{Te}(\text{Cat}^{36})_2(\text{dme})]_2$  (**8**) (dme – 1,2-dimethoxyetane). Thermal ellipsoids are given at the 30% probability level. Hydrogen atoms are omitted for clarity. Selected  $\text{Te}\cdots\text{O}$  distances (Å):  $\text{Te1}\cdots\text{O5}$  3.002(2),  $\text{Te1}\cdots\text{O6}$  3.392(2),  $\text{Te1}\cdots\text{O6}'$  3.114(2),  $\text{Te1}\cdots\text{O5}'$  3.554(3) [1].

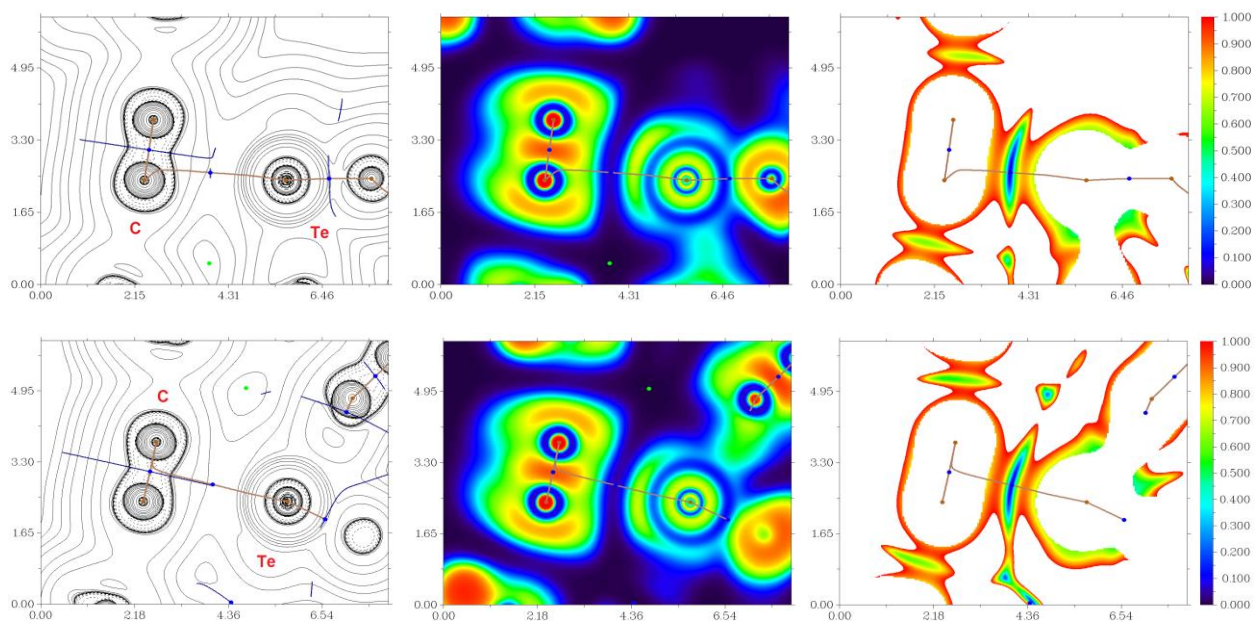

**Fig. S21.** Contour line diagram of the Laplacian of electron density distribution  $\nabla^2\rho(\mathbf{r})$ , bond paths, and selected zero-flux surfaces (left panel), visualization of electron localization function (ELF, center panel) and reduced density gradient (RDG, right panel) analyses for intermolecular interactions  $\text{Te}\cdots\text{C}$  in **1** (top: environment of Te1, bottom: environment of Te2). Bond critical points (3, -1) are shown in blue, nuclear critical points (3, -3) – in pale brown, cage critical points (3, +3) – in light green, bond paths are shown as pale brown lines, length units – Å, and the color scale for the ELF and RDG maps is presented in a.u.

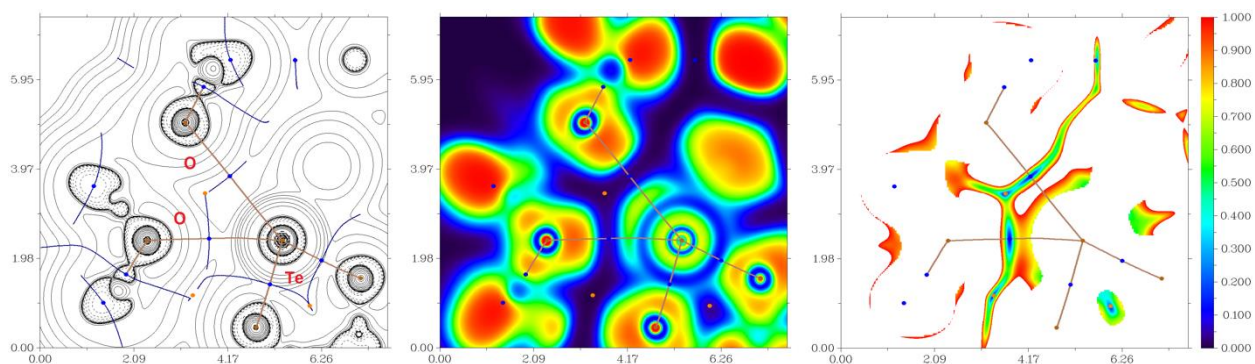

**Fig. S22.** Contour line diagram of the Laplacian of electron density distribution  $\nabla^2\rho(\mathbf{r})$ , bond paths, and selected zero-flux surfaces (left panel), visualization of electron localization function (ELF, center panel) and reduced density gradient (RDG, right panel) analyses for intermolecular interactions  $\text{Te}\cdots\text{O}$  in **8**. Bond critical points (3, -1) are shown in blue, nuclear critical points (3, -3) – in pale brown, ring critical points (3, +1) – in orange, bond paths are shown as pale brown lines, length units – Å, and the color scale for the ELF and RDG maps is presented in a.u.

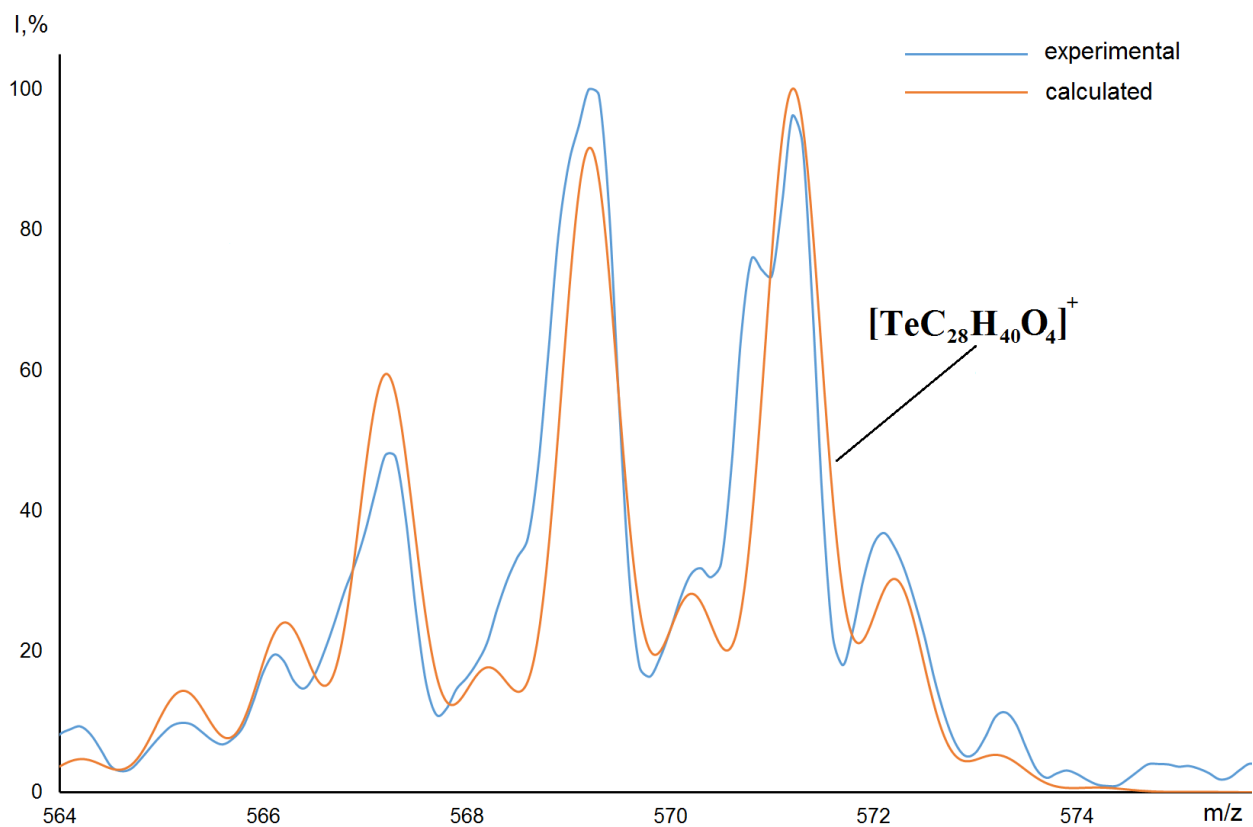

**Fig. S23.** (+)-ES-mass spectrum of  $\text{Te}(\text{Cat}^{36})_2$  (**1**).

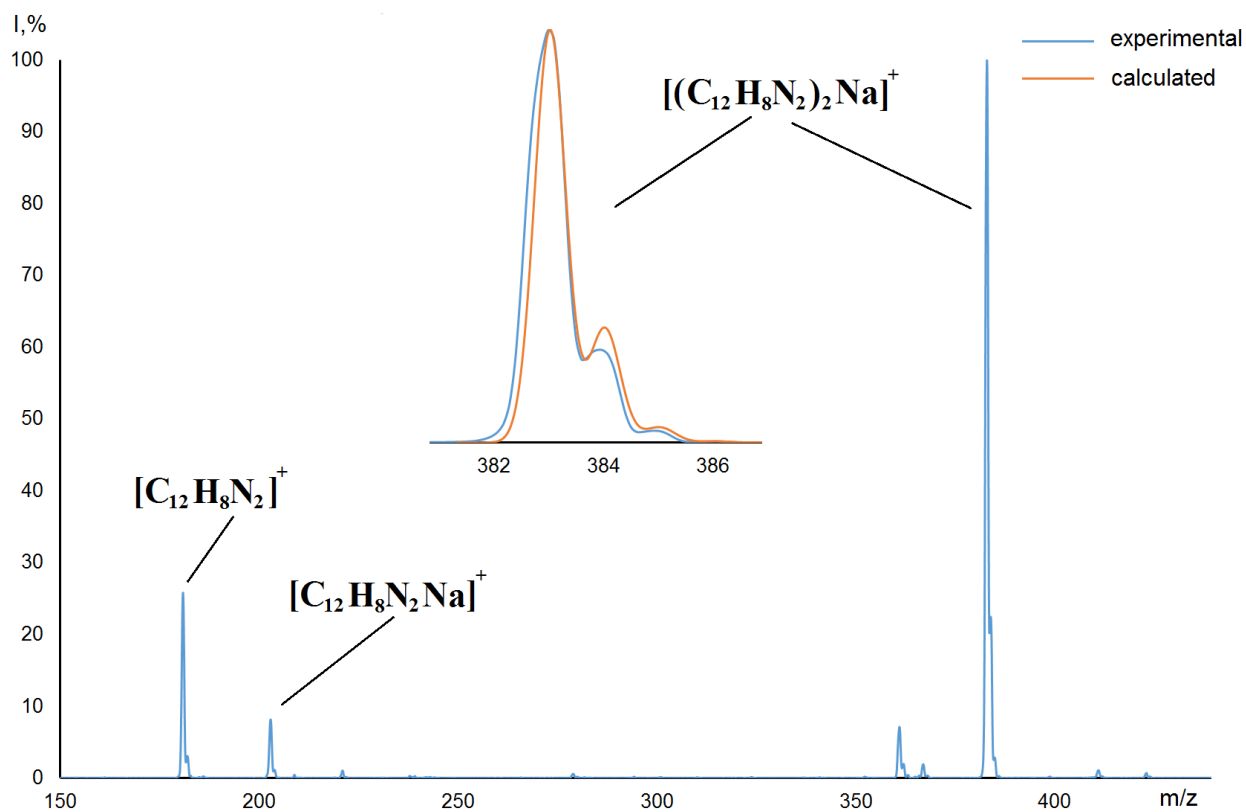

**Fig. S24.** (+)-ES-mass spectrum of  $[\text{Te}(\text{Cat}^{36})_2(\text{phen})]_2$  (**3**).

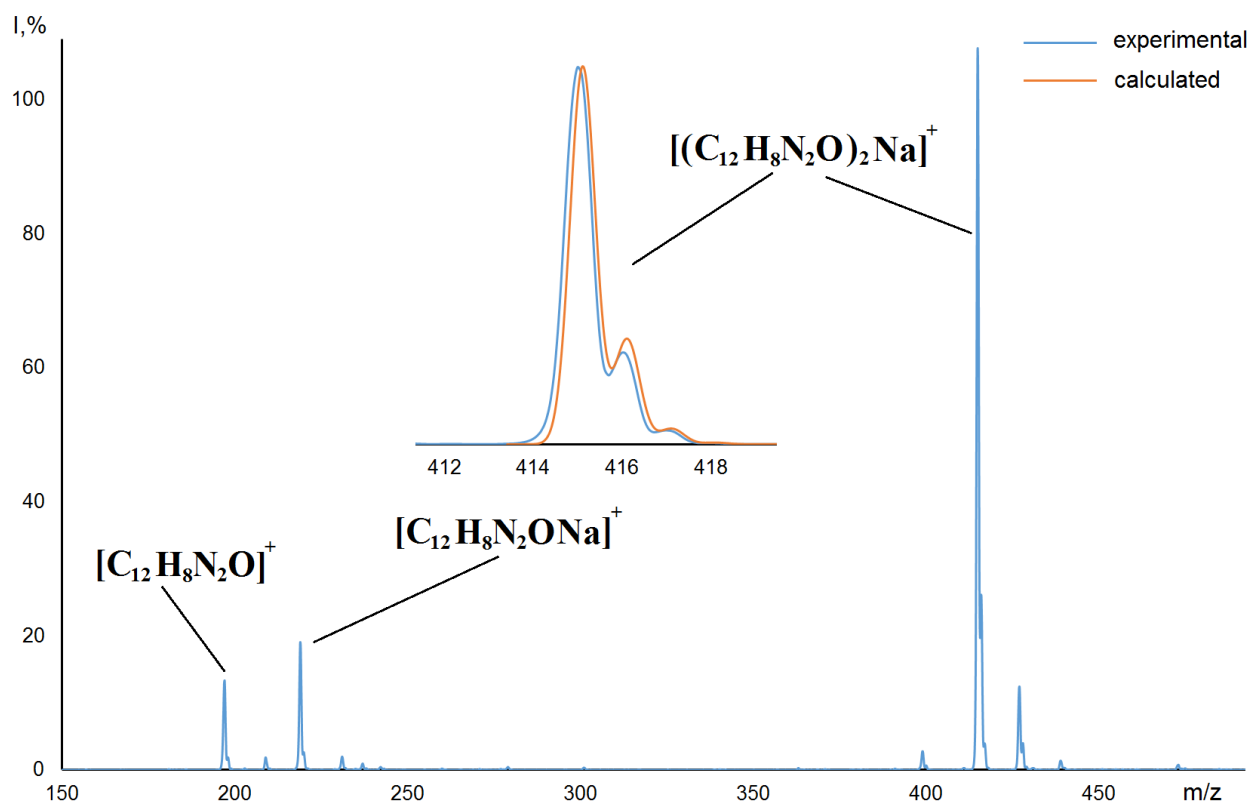

Fig. S25. (+)-ES-mass spectrum of  $[\text{Te}(\text{Cat}^{36})_2(\text{phenO})]_2$  (4).

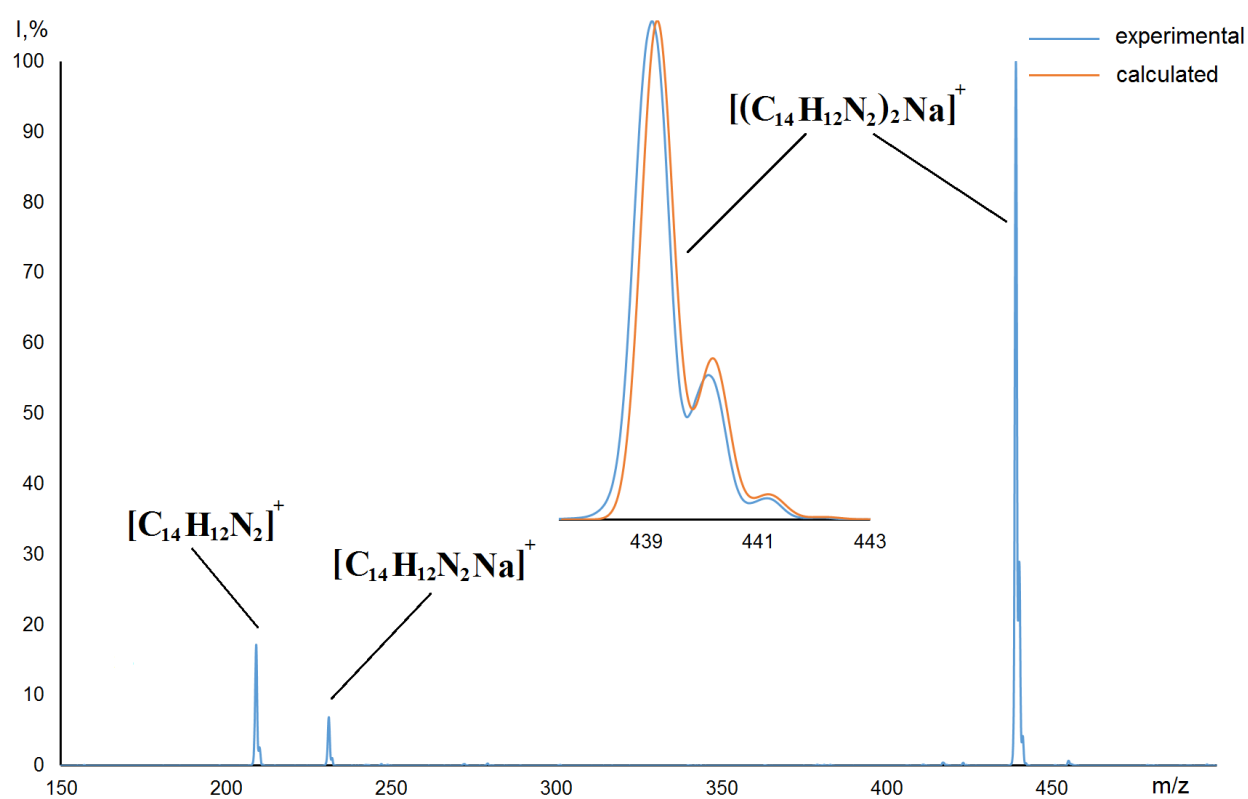

Fig. S26. (+)-ES-mass spectrum of  $[\text{Te}(\text{Cat}^{36})_2(\text{phenMe}_2)]_2$  (5).

## References

---

1. Petrov, P. A. Adducts of Sterically Hindered Tellurium Catecholate with Ethers. *Russ. J. Coord. Chem.*, **2023**, *49*, 357–362. doi: 10.1134/S1070328423600262
